# Supplementary material for: Identification of Renal Ischemia-Reperfusion Injury Subtypes and Predictive Model for Graft Loss after Kidney Transplantation Based on Programmed Cell Death-Related Genes
Source: PubMed Central journal article supplement — Kidney Dis (Basel). 2024 Sep 5;10(6):450–67. doi: 10.1159/000540158 (PMC11631021; doi:10.1159/000540158), 2024-09-05
Supplement: Supplementary_material-Suppl.1-s1.pdf [file Supplementary_material-Suppl.1-s1.pdf]

**Table S1:GEO datasets information**

| GEO ID   | Platform | Organism     | Tissue        | Expression Profiling | Samples size | Recipient age (mean ± SD) | Recipient gender (M/F) | Donor source |     |     |     |         |               |     |     | Average follow-up time |     |     |
|----------|----------|--------------|---------------|----------------------|--------------|---------------------------|------------------------|--------------|-----|-----|-----|---------|---------------|-----|-----|------------------------|-----|-----|
|          |          |              |               |                      |              |                           |                        | LD           | DBD | DCD | AKI | non-AKI | Nephrectomies | PGF | DGF |                        | IGF |     |
| GSE21374 | GPL570   | Homo sapieNM | kidney biopsy | Microarray           | 282          | NM                        | 65/40                  | NM           | NM  | NM  | NM  | NM      | NM            | NM  | NM  | NM                     | NM  | 774 |
| GSE43974 | GPL10558 | Homo sapieNM | kidney biopsy | Microarray           | 554          | NM                        | NM                     | 27           | 82  | 38  | NM  | NM      | NM            | NM  | NM  | NM                     | NM  | NM  |
| GSE37838 | GPL570   | Homo sapieNM | kidney biopsy | Microarray           | 78           | 53±13                     | 43/27                  | NM           | 53  | NM  | NM  | NM      | NM            | 8   | NM  | NM                     | NM  | NM  |
| GSE10419 | GPL887   | Homo sapieNM | kidney biopsy | Microarray           | 30           | 48±11                     | NM                     | 15           | NM  | 14  | NM  | NM      | NM            | NM  | NM  | NM                     | NM  | NM  |
| GSE90861 | GPL18573 | Homo sapieNM | kidney biopsy | RNA-Seq              | 46           | 54±10                     | 16/7                   | NM           | 16  | 7   | NM  | NM      | NM            | NM  | NM  | 11                     | 12  | NM  |
| GSE53769 | GPL16686 | Homo sapieNM | kidney biopsy | Microarray           | 36           | 48±11                     | 12/22                  | NM           | NM  | NM  | 16  | NM      | NM            | 20  | NM  | NM                     | NM  | NM  |
| GSE61739 | GPL13158 | Homo sapieNM | kidney biopsy | Microarray           | 96           | 53±13                     | NM                     | NM           | NM  | NM  | 48  | 48      | NM            | NM  | NM  | NM                     | NM  | NM  |
| GSE30718 | GPL570   | Homo sapieNM | kidney biopsy | Microarray           | 47           | NM                        | NM                     | NM           | NM  | NM  | 28  | NM      | 8             | NM  | NM  | NM                     | NM  | NM  |

DBD, donors after brain death; DCD, donors after cardiac death; LD, living donors; AKI, acute kidney injury; PGF, primary graft function; DGF, delayed graft function; IGF, immediate graft function; NM, not mentioned

**Table S2: GEO datasets information of four subclasses**

|       | GSE10419 | GSE21374 | GSE30718 | GSE37838 | GSE43974 | GSE53769 | GSE61739 | GSE90861 |
|-------|----------|----------|----------|----------|----------|----------|----------|----------|
| PCD-A | 7        | 114      | 6        | 15       | 48       | 12       | 32       | 11       |
| PCD-B | 8        | 23       | 0        | 17       | 92       | 0        | 13       | 14       |
| PCD-C | 7        | 49       | 3        | 21       | 23       | 2        | 16       | 4        |
| PCD-D | 7        | 96       | 2        | 17       | 40       | 4        | 35       | 17       |

**Table S3: The RiskScore formula**

| PCD pattern                   | Formula                                                                                                      |
|-------------------------------|--------------------------------------------------------------------------------------------------------------|
| Lysosome-dependent cell death | $-0.959*CTNS+1.475*CTSO+1.22*DNASE2+0.855*GGA3+1.033*HEXB+1.596*STXBP1$                                      |
| Autophagy                     | $-1.407*CPTP+1.45*FEZ2+-0.788*KLHL3+1.931*NOD1+-1.444*ORMDL3$                                                |
| Apoptosis                     | $3.41*ITGA6+0.862*ITM2C+-1.895*MADD+2.592*POLB+0.869*TGFB1+1.363*TNFRSF12A$                                  |
| Anoikis                       | $0.844*BAX+-1.128*BRAF+3.244*ITGA6+1.182*ATF4+1.817*PIK3R3+0.703*MUC1+-0.426*NQO1+3.089*EEF1A1+1.003*RHOB$   |
| Entosis                       | $-0.241*PCK2+-1.426*MTOR+0.269*GZMB+1.606*CTNNA1$                                                            |
| Methuosis                     | $1.984*RAC1+-1.108*GIT1+-1.597*MTOR$                                                                         |
| Paraptosis                    | $-1.41*TAAR5+2.074*NT5C+-0.794*SSTR3+-0.814*ATP23+0.287*CFD+0.538*XBP1+0.881*TNFRSF19$                       |
| Immunogenic cell death        | $1.318*BAX+0.639*CD8A+0.757*EIF2AK3+3.642*HMGB1+-0.922*IFNG+0.947*IL1B+-0.791*IL6+1.095*NT5E$                |
| NETosis                       | $1.393*HMGB1+-1.132*AGER+0.556*TGFB1$                                                                        |
| Oxeiptosis                    | $-1.305*KEAP1+-0.415*AIFM1$                                                                                  |
| Entoticcelldeath              | $1.797*CTNNA1+0.377*CYBB$                                                                                    |
| Parthanatos                   | $-0.847*MIF+-0.551*OGG1$                                                                                     |
| Cuproptosis                   | $-0.655*GLS+0.976*DBT$                                                                                       |
| Necroptosis                   | $-1.385*FTH1+1.234*BAX+1.983*CAPN2+0.78*IL1B+1.796*STAT6+-1.886*VDAC2+-3.169*CHMP7$                          |
| Ferroptosis                   | $1.85*FANCD2+1.533*G6PD+-0.421*NQO1+-1.363*PCBP2+-0.954*PEBP1+-2.775*PGD+-0.964*TFRC$                        |
| Pyroptosis                    | $0.827*BAX+1.258*CHMP4C+-4.006*CHMP7+2.663*HMGB1+-1.059*IL1A+1.983*NOD1+2.086*PLCG1+-0.836*PRKACA+1.205*TNF$ |
